# Supplementary material for: A Hybrid FPGA-Based System for EEG- and EMG-Based Online Movement Prediction
Source: PubMed Central journal article supplement (PMC5539567; doi:10.3390/s17071552), 2017-07-03
Supplement: sensors-17-01552-s001.pdf [file sensors-17-01552-s001.pdf]

# Supplementary Materials: A Hybrid FPGA-Based System for EEG- and EMG-Based Online Movement Prediction

Hendrik Wöhrle, Marc Tabie, Su Kyoung Kim, Frank Kirchner and Elsa Andrea Kirchner

## 1. Performance Scores

This supplement contains supplementary performance scores (precision, recall and specificity) for the results shown in the main manuscript.

### 1.1. Supplementary performance scores for the EMG-based movement prediction

**Table S1.** Precision, Recall and Specificity for the EMG-based movement prediction, channels 1 to 4.

| Channel                | 1     |       | 2     |       | 3     |       | 4     |       |
|------------------------|-------|-------|-------|-------|-------|-------|-------|-------|
| System type            | CPU   | FPGA  | CPU   | FPGA  | CPU   | FPGA  | CPU   | FPGA  |
| Mean Precision         | 0.278 | 0.280 | 0.303 | 0.303 | 0.102 | 0.102 | 0.132 | 0.119 |
| Median Precision       | 0.272 | 0.272 | 0.309 | 0.309 | 0.106 | 0.106 | 0.106 | 0.099 |
| Mean Recall/TPR        | 0.808 | 0.808 | 0.841 | 0.841 | 0.714 | 0.714 | 0.847 | 0.854 |
| Median Recall/TPR      | 0.879 | 0.879 | 0.947 | 0.947 | 0.707 | 0.707 | 0.882 | 0.905 |
| Mean Specificity/TNR   | 0.974 | 0.974 | 0.975 | 0.975 | 0.921 | 0.921 | 0.907 | 0.895 |
| Median Specificity/TNR | 0.973 | 0.973 | 0.973 | 0.973 | 0.923 | 0.923 | 0.926 | 0.904 |

**Table S2.** Precision, Recall and Specificity for the EMG-based movement prediction, channels 5 to 8.

| Channel                | 5     |       | 6     |       | 7     |       | 8     |       |
|------------------------|-------|-------|-------|-------|-------|-------|-------|-------|
| System type            | CPU   | FPGA  | CPU   | FPGA  | CPU   | FPGA  | CPU   | FPGA  |
| Mean Precision         | 0.020 | 0.021 | 0.017 | 0.017 | 0.016 | 0.016 | 0.018 | 0.018 |
| Median Precision       | 0.013 | 0.012 | 0.015 | 0.016 | 0.014 | 0.014 | 0.016 | 0.016 |
| Mean Recall/TPR        | 0.071 | 0.070 | 0.250 | 0.250 | 0.237 | 0.237 | 0.323 | 0.323 |
| Median Recall/TPR      | 0.049 | 0.041 | 0.240 | 0.240 | 0.195 | 0.195 | 0.316 | 0.316 |
| Mean Specificity/TNR   | 0.955 | 0.956 | 0.854 | 0.855 | 0.863 | 0.863 | 0.813 | 0.813 |
| Median Specificity/TNR | 0.965 | 0.966 | 0.844 | 0.845 | 0.862 | 0.863 | 0.806 | 0.805 |

**Table S3.** Precision, Recall and Specificity for the EMG-based movement prediction, for channel combinations  $1 \in [1, \dots, 8]$  to  $2 \in [1, \dots, 4]$ .

| Channel                | $1 \in [1, \dots, 8]$ |       | $2 \in [1, \dots, 8]$ |       | $4 \in [1, \dots, 8]$ |       | $1 \in [1, \dots, 4]$ |       | $2 \in [1, \dots, 4]$ |       |
|------------------------|-----------------------|-------|-----------------------|-------|-----------------------|-------|-----------------------|-------|-----------------------|-------|
| System type            | CPU                   | FPGA  | CPU                   | FPGA  | CPU                   | FPGA  | CPU                   | FPGA  | CPU                   | FPGA  |
| Mean Precision         | 0.210                 | 0.206 | 0.209                 | 0.122 | 0.198                 | 0.198 | 0.332                 | 0.303 | 0.412                 | 0.168 |
| Median Precision       | 0.195                 | 0.191 | 0.164                 | 0.112 | 0.149                 | 0.148 | 0.319                 | 0.296 | 0.455                 | 0.163 |
| Mean Recall/TPR        | 0.931                 | 0.908 | 0.851                 | 0.946 | 0.485                 | 0.496 | 0.937                 | 0.937 | 0.882                 | 0.964 |
| Median Recall/TPR      | 0.961                 | 0.929 | 0.899                 | 0.972 | 0.398                 | 0.393 | 0.978                 | 0.978 | 0.950                 | 0.985 |
| Mean Specificity/TNR   | 0.947                 | 0.947 | 0.945                 | 0.898 | 0.963                 | 0.963 | 0.971                 | 0.966 | 0.982                 | 0.928 |
| Median Specificity/TNR | 0.946                 | 0.946 | 0.957                 | 0.900 | 0.980                 | 0.980 | 0.973                 | 0.971 | 0.987                 | 0.933 |

## 1.2. Supplementary performance scores for the MRCP-based movement prediction

**Table S4.** Precision, Recall and Specificity for the MRCP-based movement prediction.

| Number of channels     | 32    |       | 64    |       | 96    |       | 124   |       |
|------------------------|-------|-------|-------|-------|-------|-------|-------|-------|
|                        | CPU   | FPGA  | CPU   | FPGA  | CPU   | FPGA  | CPU   | FPGA  |
| Mean Precision         | 0.084 | 0.081 | 0.095 | 0.092 | 0.108 | 0.109 | 0.116 | 0.111 |
| Median Precision       | 0.086 | 0.091 | 0.101 | 0.099 | 0.106 | 0.109 | 0.114 | 0.101 |
| Mean Recall/TPR        | 0.887 | 0.856 | 0.891 | 0.878 | 0.896 | 0.884 | 0.867 | 0.866 |
| Median Recall/TPR      | 0.914 | 0.894 | 0.911 | 0.897 | 0.925 | 0.912 | 0.909 | 0.877 |
| Mean Specificity/TNR   | 0.776 | 0.808 | 0.821 | 0.818 | 0.853 | 0.858 | 0.868 | 0.863 |
| Median Specificity/TNR | 0.776 | 0.808 | 0.821 | 0.818 | 0.853 | 0.858 | 0.868 | 0.863 |

## 1.3. Supplementary performance scores for the P300 detection

**Table S5.** Precision, Recall and Specificity for the P300 detection.

| Number of channels     | 32    |       | 64    |       | 96    |       | 124   |       |
|------------------------|-------|-------|-------|-------|-------|-------|-------|-------|
|                        | CPU   | FPGA  | CPU   | FPGA  | CPU   | FPGA  | CPU   | FPGA  |
| Mean Precision         | 0.695 | 0.710 | 0.736 | 0.739 | 0.750 | 0.750 | 0.776 | 0.776 |
| Median Precision       | 0.713 | 0.734 | 0.744 | 0.764 | 0.773 | 0.779 | 0.783 | 0.772 |
| Mean Recall/TPR        | 0.869 | 0.871 | 0.868 | 0.871 | 0.858 | 0.877 | 0.861 | 0.860 |
| Median Recall/TPR      | 0.882 | 0.872 | 0.859 | 0.857 | 0.860 | 0.880 | 0.868 | 0.869 |
| Mean Specificity/TNR   | 0.951 | 0.954 | 0.961 | 0.960 | 0.962 | 0.962 | 0.969 | 0.969 |
| Median Specificity/TNR | 0.955 | 0.962 | 0.963 | 0.967 | 0.967 | 0.970 | 0.975 | 0.971 |
